# Supplementary material for: Glucocorticoids induce long-lasting effects in neural stem cells resulting in senescence-related alterations
Source: PubMed Central journal article supplement — Cell Death Dis. 2010 Nov 4;1(11):e92–. doi: 10.1038/cddis.2010.60 (PMC3032322; doi:10.1038/cddis.2010.60), 2010-11-04
Supplement: cddis201060x1.pdf [file cddis201060x1.pdf]

Supplementary Figure 1

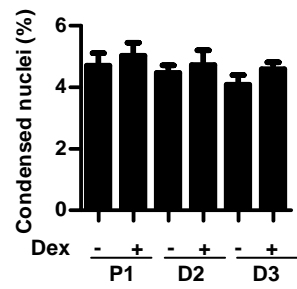

Supplementary Figure 2

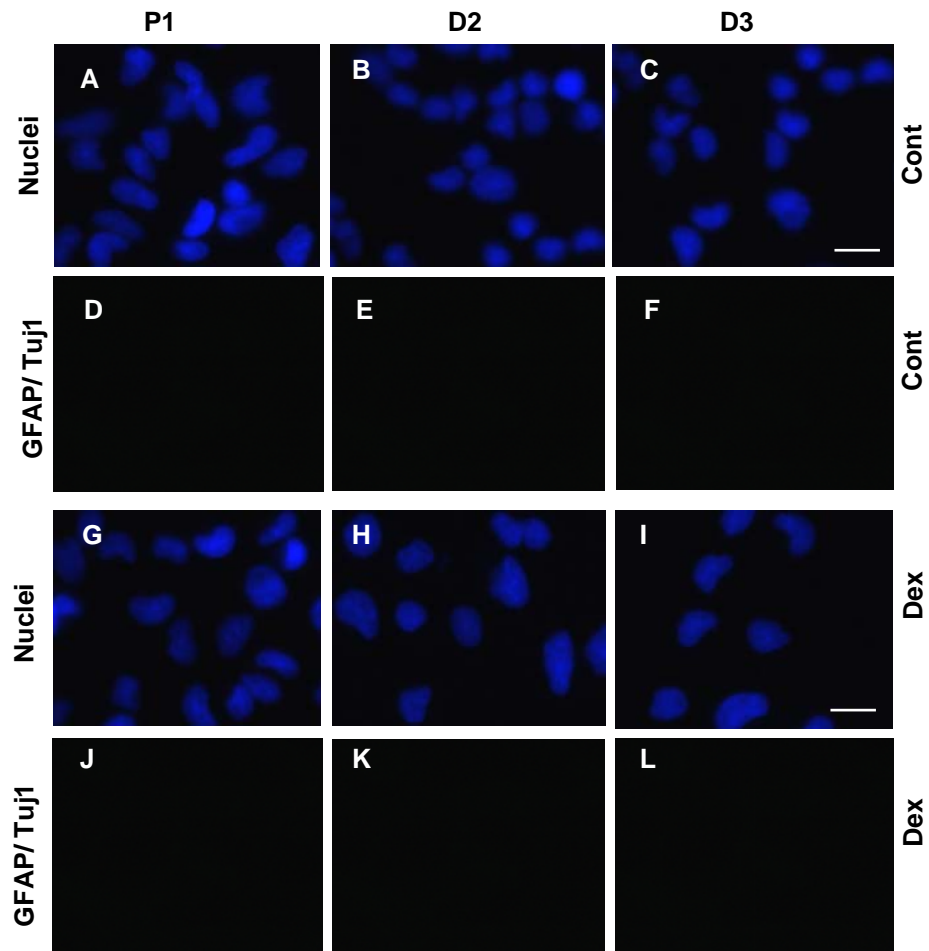

Supplementary Figure 3

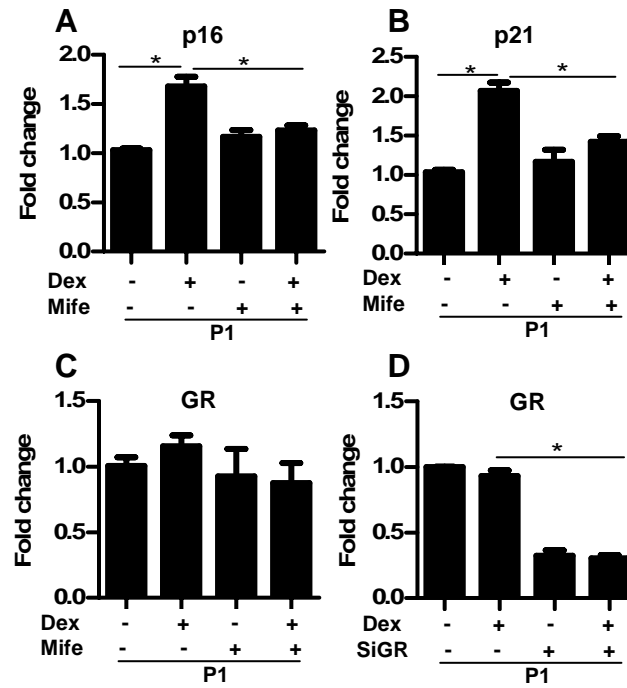

Supplementary Figure 4

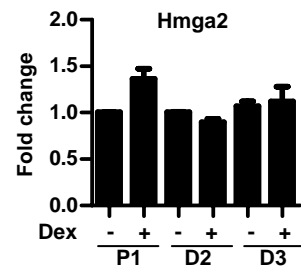

## Supplementary Table S1

| <b>Functional cluster</b> | <b>Primer name</b> | <b>Forward</b>          | <b>Reverse</b>        |
|---------------------------|--------------------|-------------------------|-----------------------|
| Cell cycle regulation     | p21                | acacgctcccagacgtagtt    | agcaaagtatgccgtcgtct  |
|                           | p16                | cca gaagtgaagccaaggag   | gtgc ggtattgcggtatct  |
| Cellular senescence       | Hmga1              | caggaa aaggatgggactga   | ctgttcttgcttccctcg    |
|                           | Hmga2              | aaggcagcaagaacaagagc    | ggactcttgcgag gatgct  |
|                           | Bmi1               | tgtgtcctgtgtgagggtta    | cattttgaaaagccctgga   |
| Mitochondrial genes       | Nd3                | tccgaaaaagcaaaccata     | ttggtgtttgaatcgctca   |
|                           | Cytb               | acaaaa tccattccatcca    | gttgggaa tggagcgtagaa |
| Glucocorticoid receptor   | GR                 | tggctcttcagacctcct      | gcctgggttggagatcata   |
| DNA methylation           | Dnmt1              | cca cca cca agctggtctat | tacggccaagttaggacacc  |
|                           | Dnmt3a             | ccaatggagactggagaa      | tcgatgttggtctgctctg   |
|                           | Dnmt3b             | gtgaagcggatgatggagat    | cctccgagacttgtagctg   |
| Housekeeping gene         | Hprt               | agggcatatccaacaacaaac   | gtcaacgggggacataaaag  |
